# Supplementary material for: Analgesic Use in Patients With Advanced Chronic Kidney Disease: A Systematic Review and Meta-Analysis
Source: PubMed Central journal article supplement — Can J Kidney Health Dis. 2020 Mar 6;7:2054358120910329. doi: 10.1177/2054358120910329 (PMC8851133; doi:10.1177/2054358120910329), 2020-03-06
Supplement: Table_S2_Excluded_Studies_170519.pdf [file Table_S2_Excluded_Studies_170519.pdf]

**Supplementary Table 2. Excluded studies and reasons for exclusion**

| <b>Study</b>                 | <b>Reason for Exclusion</b>                                                                                               |
|------------------------------|---------------------------------------------------------------------------------------------------------------------------|
| <b>Andreucci 2004</b>        | No original data                                                                                                          |
| <b>Arboleya 2003</b>         | No original data                                                                                                          |
| <b>Atalay 2013</b>           | Unable to determine prevalence                                                                                            |
| <b>Awdishu 2016</b>          | Does not meet analgesic use criteria                                                                                      |
| <b>Bilge 2013</b>            | Only reports prevalence of inappropriate use                                                                              |
| <b>Biyik 2013</b>            | Unable to determine prevalence                                                                                            |
| <b>Bouck 2018</b>            | Population selected for CKD related diagnosis does not specify stage                                                      |
| <b>Brookhart 2015</b>        | Poster                                                                                                                    |
| <b>Butler 2013</b>           | Letter to the editor                                                                                                      |
| <b>Butler 2014</b>           | Letter to the editor                                                                                                      |
| <b>Calls 2009</b>            | Duplicate study population                                                                                                |
| <b>Caravaca 2016</b>         | Unable to determine prevalence: no raw data on prevalence                                                                 |
| <b>Chater 2006</b>           | Does not meet population inclusion criteria: discontinued dialysis only (end of life)                                     |
| <b>Clark 2002</b>            | Does not meet population inclusion criteria: general medical population                                                   |
| <b>Cohen 2000</b>            | Does not meet population inclusion criteria: discontinued dialysis only (end of life)                                     |
| <b>Coluzzi 2018</b>          | Review article                                                                                                            |
| <b>Cortés-Sanabria 2008.</b> | Does not meet population inclusion criteria: patients selected based on diagnosis of diabetes                             |
| <b>Dabers 2017</b>           | Review article                                                                                                            |
| <b>Daubresse 2018</b>        | Abstract                                                                                                                  |
| <b>Davison 2008</b>          | Unable to determine prevalence: 100% prevalence required                                                                  |
| <b>Davison 2015</b>          | No original data                                                                                                          |
| <b>Desmedt 2018</b>          | Prevalence of inappropriate drug dosages/prescriptions and population includes CKD stage 2                                |
| <b>Droney 2007</b>           | Does not meet analgesic use criteria: prescriber prevalence                                                               |
| <b>Eppenga 2015</b>          | Study protocol                                                                                                            |
| <b>Fox 2008</b>              | Initial chart audit selected patients with diabetes mellitus and/or hypertension to identify CKD patients                 |
| <b>Gamondi 2010</b>          | Abstract                                                                                                                  |
| <b>Gardiner 2012</b>         | Does not meet population inclusion criteria                                                                               |
| <b>Gottesdiener 2003</b>     | Unable to determine prevalence: 100% prevalence required                                                                  |
| <b>Graczyk 2006</b>          | Unable to determine prevalence: 100% prevalence required                                                                  |
| <b>Green 2012</b>            | No analgesic data                                                                                                         |
| <b>Heleniak 2013</b>         | Abstract                                                                                                                  |
| <b>Hinton 2006</b>           | Unable to determine prevalence                                                                                            |
| <b>Ishida 2018 (JASN)</b>    | Unable to determine prevalence                                                                                            |
| <b>Jankovic 2009</b>         | Does not meet population inclusion criteria: patients selected based on at least one incident of a gastrointestinal bleed |
| <b>Kuo 2010</b>              | Risk association and progression of chronic kidney disease                                                                |
| <b>Kurella Tamura 2010</b>   | Does not meet analgesic use criteria                                                                                      |
| <b>Lentine 2015</b>          | Does not meet analgesic use criteria: does not separate acute pain from chronic pain                                      |

|                                                                      |                                                                                                                                                                        |
|----------------------------------------------------------------------|------------------------------------------------------------------------------------------------------------------------------------------------------------------------|
| <b>Liang 2014</b>                                                    | Does not meet population inclusion criteria: patient selected based diagnoses of peptic ulcers                                                                         |
| <b>Maldonado 2015</b>                                                | No original data                                                                                                                                                       |
| <b>Manias2008</b>                                                    | Unable to determine prevalence                                                                                                                                         |
| <b>Meghani 2014</b>                                                  | Does not meet population inclusion criteria: selected based on diagnosis of cancer                                                                                     |
| <b>Mercadante 2005</b>                                               | Letter to editor                                                                                                                                                       |
| <b>Meuwesen 2016</b>                                                 | Unable to determine prevalence: only included patients with NSAID claims                                                                                               |
| <b>Micozkadioglu 2004</b>                                            | Gabapentin/levodopa trial for restless legs                                                                                                                            |
| <b>Narvaez Tamayo 2015</b>                                           | No original data                                                                                                                                                       |
| <b>Nderitu 2014</b>                                                  | Does not meet population inclusion criteria: general practice patient population                                                                                       |
| <b>Novick 2018</b>                                                   | Research letter                                                                                                                                                        |
| <b>Nuckols 2013</b>                                                  | Systematic review                                                                                                                                                      |
| <b>Olivo 2015</b>                                                    | Unable to determine prevalence: 100% prevalence required                                                                                                               |
| <b>Paramanandam 2011</b>                                             | Unable to determine prevalence                                                                                                                                         |
| <b>Patel 2013</b>                                                    | Systematic review                                                                                                                                                      |
| <b>Perlman 2013 (Annual Conference of the Canadian Pain Society)</b> | Abstract                                                                                                                                                               |
| <b>Perlman 2013 (Pain)</b>                                           | Does not meet analgesic use criteria: does not separate acute pain from chronic pain                                                                                   |
| <b>Pham 2010</b>                                                     | Does not meet population criteria: data for CKD stages 1-2 not separate from 3-5                                                                                       |
| <b>Pham 2017</b>                                                     | Review article                                                                                                                                                         |
| <b>Quartarolo 2007</b>                                               | Does not meet analgesic use criteria                                                                                                                                   |
| <b>Quintana-Bárcena 2018</b>                                         | Prevalence of baseline drug-related problem calculated from data a year prior to recruitment. Some participants may have been CKD Stage 2 a year prior to recruitment. |
| <b>Rebollo 2014</b>                                                  | Abstract                                                                                                                                                               |
| <b>Rodríguez Calero 2009</b>                                         | Duplicate study population                                                                                                                                             |
| <b>Ruchi 2017</b>                                                    | Abstract                                                                                                                                                               |
| <b>Saad 2018</b>                                                     | Residents' awareness of dose adjustments                                                                                                                               |
| <b>Salisbury 2009</b>                                                | Unable to determine prevalence                                                                                                                                         |
| <b>Samolsky Dekel 2016</b>                                           | Unable to determine prevalence: 100% prevalence required                                                                                                               |
| <b>Shah 2014</b>                                                     | Does not meet analgesic use criteria                                                                                                                                   |
| <b>Simsek 2016</b>                                                   | Abstract                                                                                                                                                               |
| <b>Solak 2012</b>                                                    | Unable to determine prevalence                                                                                                                                         |
| <b>Su 2009</b>                                                       | Case report                                                                                                                                                            |
| <b>Surana 2017</b>                                                   | Awareness of dose adjustments                                                                                                                                          |
| <b>Unruh 2006</b>                                                    | Data collected prior to 2000                                                                                                                                           |
| <b>Williams 2007 (Journal of Evaluation in Clinical Practice)</b>    | Does not meet analgesic use criteria: nurses' analgesic preferences                                                                                                    |
| <b>Williams 2007 (Renal Society of Australasia Journal)</b>          | Does not separate surgery pain from chronic pain                                                                                                                       |
| <b>Williams 2008</b>                                                 | Systematic review                                                                                                                                                      |

|                      |                   |
|----------------------|-------------------|
| <b>Williams 2009</b> | Qualitative data  |
| <b>Wittmann 2015</b> | No original data  |
| <b>Wyne 2011</b>     | Systematic review |
| <b>Yang 2016</b>     | Abstract          |
| <b>Zhao 2015</b>     | Abstract          |
