# Supplementary material for: Analgesic Use in Patients With Advanced Chronic Kidney Disease: A Systematic Review and Meta-Analysis
Source: PubMed Central journal article supplement — Can J Kidney Health Dis. 2020 Mar 6;7:2054358120910329. doi: 10.1177/2054358120910329 (PMC8851133; doi:10.1177/2054358120910329), 2020-03-06
Supplement: Table_S3-Detailed_Prevalence_Revised_191219.pdf [file Table_S3-Detailed_Prevalence_Revised_191219.pdf]

**Table S3: Prevalence categories with number of articles, estimated pooled prevalence, and  $I^2$**

| Category                                                                                   | Number of Articles | Pooled Prevalence [95% CI] | $I^2$  |
|--------------------------------------------------------------------------------------------|--------------------|----------------------------|--------|
| Overall Analgesic <sup>14, 16-18, 20, 23, 25, 29, 33, 36, 37, 43, 45, 46, 48, 49, 52</sup> | 17                 | 50.8% [38.3-63.3%]         | 99.4%  |
| Opioid <sup>14-16, 18, 19, 21, 24, 26, 31, 37, 38, 40, 44</sup>                            | 13                 | 23.8% [15.2-33.7%]         | 100.0% |
| Weak Opioid <sup>17, 20, 23, 26, 36, 43, 45, 46</sup>                                      | 8                  | 17.1% [10.8-24.5%]         | 83.8%  |
| Tramadol <sup>16, 19, 33, 37, 38, 43, 48</sup>                                             | 7                  | 7.7% [2.2-16.0%]           | 99.9%  |
| Codeine <sup>20, 37, 38, 48</sup>                                                          | 4                  | 5.7% [1.1-13.6%]           | 99.9%  |
| Propoxyphene <sup>16, 20, 38</sup>                                                         | 3                  | 1.6% [0.9-2.4%]            | 60.6%  |
| Strong Opioid <sup>20, 26, 33, 36, 45, 46</sup>                                            | 6                  | 6.7% [3.2-11.2%]           | 74.8%  |
| Oxycodone <sup>16, 20, 37, 38, 48</sup>                                                    | 5                  | 7.7% [1.4-18.4%]           | 99.9%  |
| Morphine <sup>20, 37, 38, 48</sup>                                                         | 4                  | 1.2% [0.4-2.5%]            | 99.2%  |
| Hydrocodone <sup>16, 38, 48</sup>                                                          | 3                  | 17.1% [1.7-43.7%]          | 100.0% |
| Hydromorphone <sup>20, 38, 48</sup>                                                        | 3                  | 2.3% [0.4-5.5%]            | 99.8%  |
| Fentanyl <sup>20, 38, 48</sup>                                                             | 3                  | 2.0% [0.7-3.8%]            | 99.5%  |
| Methadone <sup>20, 37, 48</sup>                                                            | 3                  | 0.9% [0.2-1.8%]            | 51.6%  |
| Pethidine <sup>20</sup>                                                                    | 1                  | 1.0% [0.0-4.1%]            | N/A    |
| NSAID <sup>14, 15, 19, 20, 22, 26-28, 30, 32, 34, 35, 37, 39-42, 47, 50</sup>              | 19                 | 17.2% [12.6-22.3%]         | 99.6%  |
| Diclofenac <sup>22, 30, 33, 37, 39, 50</sup>                                               | 6                  | 3.0% [0.9-6.2%]            | 89.6%  |
| Ibuprofen <sup>22, 33, 37, 39, 50</sup>                                                    | 5                  | 9.5% [3.6-17.7%]           | 95.8%  |
| Cox-2 Inhibitors <sup>30, 39, 50</sup>                                                     | 4                  | 4.0% [1.1-8.4%]            | 84.6%  |
| Ketoprofen <sup>30, 33</sup>                                                               | 2                  | 20.5% [1.1-53.8%]          | 96.6%  |
| Naproxen <sup>37, 39</sup>                                                                 | 2                  | 1.2% [1.0-1.5%]            | 0.0%   |
| Nimesulide <sup>30</sup>                                                                   | 1                  | 7.1% [3.0-12.8%]           | N/A    |
| Ketolorac <sup>30</sup>                                                                    | 1                  | 7.1% [3.0-12.8%]           | N/A    |
| Dexketoprofen <sup>50</sup>                                                                | 1                  | 1.9% [0.2-4.8%]            | N/A    |
| Indomethacin <sup>37</sup>                                                                 | 1                  | 1.0% [0.1-2.5%]            | N/A    |
| Acemetacin <sup>22</sup>                                                                   | 1                  | 0.9% [0.0-4.0%]            | N/A    |
| Piroxicam <sup>30</sup>                                                                    | 1                  | 0.9% [0.0-3.8%]            | N/A    |
| Etodolac <sup>37</sup>                                                                     | 1                  | 0.3% [0.0-1.4%]            | N/A    |
| Salsalate <sup>37</sup>                                                                    | 1                  | 0.3% [0.0-1.4%]            | N/A    |
| Other NSAID <sup>30, 33, 39</sup>                                                          | 3                  | 7.0% [3.1-12.1%]           | 80.5%  |
| Acetaminophen <sup>14, 15, 19, 20, 33, 36, 37, 43</sup>                                    | 8                  | 27.5% [17.6-38.5%]         | 98.6%  |
| Adjuvants <sup>19, 20, 26, 36, 43</sup>                                                    | 5                  | 23.4% [16.5-31.0%]         | 58.4%  |
| Non-Opioid <sup>16-18, 20, 23, 37, 38, 46</sup>                                            | 8                  | 26.8% [19.2-35.2%]         | 96.9%  |
| Tricyclic Antidepressants <sup>53</sup>                                                    | 1                  | 1.7% [1.7-1.8%]            | N/A    |
